# Supplementary material for: Knowledge of antibiotics and antibiotic resistance among Norwegian pharmacy customers – a cross-sectional study
Source: Springer Nature journal article supplement (doi:10.1186/s12889-019-6409-x), 2019-01-15
Supplement: MOESM1 [file 16399370]

*Supplementary table 1 Association between various characteristics and knowledge of antibiotics and antibiotic resistance (univariate linear regression)*

|                              | Antibiotics, general |               |               | Antibiotic resistance |               |               |
|------------------------------|----------------------|---------------|---------------|-----------------------|---------------|---------------|
|                              | Coeff.               | 95% CI        |               | Coeff.                | 95% CI        |               |
| Beliefs about medicines, BMQ |                      |               |               |                       |               |               |
| Benefit                      | <b>0.163</b>         | <b>0.086</b>  | <b>0.241</b>  | <b>0.188</b>          | <b>0.132</b>  | <b>0.243</b>  |
| Harm                         | <b>-0.183</b>        | <b>-0.252</b> | <b>-0.115</b> | <b>-0.146</b>         | <b>-0.196</b> | <b>-0.096</b> |
| Overuse                      | -0.002               | -0.078        | 0.073         | -0.037                | -0.092        | 0.018         |
| Attitude antibiotics, score  |                      |               |               |                       |               |               |
| Restrictive                  | <b>0.333</b>         | <b>0.170</b>  | <b>0.496</b>  | <b>0.316</b>          | <b>0.198</b>  | <b>0.434</b>  |
| Less restrictive             | <b>-0.239</b>        | <b>-0.334</b> | <b>-0.144</b> | <b>-0.230</b>         | <b>-0.298</b> | <b>-0.162</b> |
| Age*                         |                      |               |               |                       |               |               |
| 30-44 years                  | 0.784                | 0.198         | 1.369         | <b>0.929</b>          | <b>0.501</b>  | <b>1.357</b>  |
| 45-59 years                  | 0.727                | 0.177         | 1.277         | <b>0.906</b>          | <b>0.504</b>  | <b>1.309</b>  |
| >=60 years                   | -0.472               | -0.981        | 0.036         | 0.477                 | 0.105         | 0.849         |
| Gender*                      |                      |               |               |                       |               |               |
| Men                          | <b>-1.312</b>        | <b>-1.704</b> | <b>-0.910</b> | -0.055                | -0.347        | 0.238         |
| Education*                   |                      |               |               |                       |               |               |
| Upper secondary school       | 0.657                | -0.061        | 1.37          | 0.411                 | -0.101        | 0.922         |
| College/University ≤3y       | 0.949                | 0.213         | 1.685         | <b>1.151</b>          | <b>0.626</b>  | <b>1.675</b>  |
| College/University >3y       | <b>1.807</b>         | <b>1.072</b>  | <b>2.541</b>  | <b>1.658</b>          | <b>1.135</b>  | <b>2.181</b>  |
| Health professional**        |                      |               |               |                       |               |               |
| Yes                          | <b>2.147</b>         | <b>1.748</b>  | <b>2.547</b>  | <b>1.057</b>          | <b>0.755</b>  | <b>1.359</b>  |
| Do not know                  | 1.159                | -0.115        | 2.433         | -0.448                | -1.413        | 0.516         |
| Antibiotics use last 12      |                      |               |               |                       |               |               |
| Yes                          | <b>0.434</b>         | <b>0.027</b>  | <b>0.841</b>  | 0.123                 | -0.174        | 0.419         |
| Do not remember              | -1.474               | -3.077        | 0.129         | -1.484                | -2.652        | -0.317        |
| Healthy                      |                      |               |               |                       |               |               |
| score                        | -0.003               | -0.201        | 0.173         | -0.067                | -0.203        | 0.069         |
| Chronic disease**            |                      |               |               |                       |               |               |
| Yes                          | 0.346                | -0.034        | 0.726         | -0.004                | -0.282        | 0.274         |
| Will not tell                | -0.180               | -1.505        | 1.145         | -0.427                | -1.395        | 0.541         |
| Medication**                 |                      |               |               |                       |               |               |
| Some times                   | -0.058               | -0.823        | 0.708         | -0.333                | -0.891        | 0.225         |
| Yes                          | <b>-0.462</b>        | <b>-0.859</b> | <b>-0.065</b> | -0.204                | -0.493        | 0.086         |
| Smoking**                    |                      |               |               |                       |               |               |
| Some times                   | -0.077               | -0.870        | 0.717         | -0.588                | -1.164        | -0.013        |
| Yes                          | -0.141               | -0.759        | 0.477         | -0.376                | -0.824        | 0.071         |
| Marital status*              |                      |               |               |                       |               |               |
| Relationship                 | -0.874               | -1.569        | -0.180        | -0.323                | -0.828        | 0.183         |
| Single                       | -0.483               | -0.914        | -0.051        | -0.415                | -0.729        | -0.101        |
| Other                        | -0.894               | -2.065        | 0.278         | -0.716                | -1.569        | 0.137         |
| Work*                        |                      |               |               |                       |               |               |
| Not working                  | -0.236               | -0.715        | 0.243         | <b>-0.670</b>         | <b>-1.023</b> | <b>-0.317</b> |
| Student                      | -0.786               | -1.438        | -0.133        | <b>-0.963</b>         | <b>-1.444</b> | <b>-0.483</b> |
| Retired                      | <b>-1.531</b>        | <b>-1.998</b> | <b>-1.065</b> | <b>-0.746</b>         | <b>-1.090</b> | <b>-0.403</b> |

---

CI = Confidence Interval, Coeff.= beta coefficient from univariate linear regression

The numbers (coefficients and accompanying confidence Intervals (CI)) represent change in knowledge score for antibiotics in general and antibiotic resistance respectively.

Significant associations ( $p < 0.001$ ), are marked in bold.

\* Reference category is "18-29 years" for age, "women" for gender, "primary/lower secondary school" for education, "married/cohabiting" for marital status and "active work" for work situation.

\*\* Reference category is "no".

\*\*\* Ten participants had "do not know" on all 23 knowledge items while 59 had missing on at least one item. Number of missing per knowledge item varied from 0 to 11. All missing values were set to zero.
